# Supplementary material
Source: PubMed Central journal article supplement (PMC4589465)
Supplement: NIHMS708555-supplement-supplementary_data_2.pdf [file NIHMS708555-supplement-supplementary_data_2.pdf]

## Online supplementary material

Tables 3; Figures 1.

### A longitudinal twin study of Borderline and Antisocial personality disorder traits in early to middle adulthood.

Ted Reichborn-Kjennerud, Nikolai Czajkowski, Eivind Ystrøm, Ragnhild Ørstavik, Steven H. Aggen, Kristian Tambs, Svenn Torgersen, Michael C. Neale, Espen Røysamb, Robert F. Krueger, Gun Peggy Knudsen, Kenneth S. Kendler

**Table S1. Complete and incomplete twin pairs by zygosity group**

| Zygosity group | Wave 1             |                  | Wave 2         |                  |
|----------------|--------------------|------------------|----------------|------------------|
|                | Complete pairs     | Incomplete pairs | Complete pairs | Incomplete pairs |
| MZ Male        | 220                | 5                | 154            | 49               |
| DZ Male        | 117                | 3                | 76             | 36               |
| MZ Female      | 449                | 4                | 357            | 63               |
| DZ Female      | 449 <del>259</del> | 8                | 179            | 59               |
| DZ Unlike sex  | 340                | 3                | 219            | 104              |

MZ, Monozygotic; DZ Dizygotic

**Table S2. Within pair twin correlation with 95% Confidence intervals**

|            | T1 ASPD W1                              | T1 BPD W1                                | T1 ASPD W2                               | T1 BPD W2                                |
|------------|-----------------------------------------|------------------------------------------|------------------------------------------|------------------------------------------|
| T2 ASPD W1 | 0.41 (0.32,0.50) /<br>0.11 (0.03, 0.15) | 0.27 (0.22,0.33)                         | 0.37 (0.32, 0.40)                        | 0.21 (0.18, 0.30)                        |
| T2 BPD W1  | 0.12 (0.07, 0.17)                       | 0.33 (0.26, 0.42) /<br>0.18 (0.12, 0.23) | 0.22 (0.15, 0.31)                        | 0.24 (0.23, 0.31)                        |
| T2 ASPD W2 | 0.23 (0.16, 0.33)                       | 0.19 (0.11, 0.26)                        | 0.40 (0.35, 0.52) /<br>0.23 (0.14, 0.38) | 0.25 (0.17, 0.35)                        |
| T2 BPD W2  | 0.15 (0.07, 0.24)                       | 0.19 (0.14, 0.26)                        | 0.18 (0.15, 0.30)                        | 0.26 (0.16, 0.35) /<br>0.20 (0.16, 0.34) |

Monozygotic twins above the diagonal, dizygotic below the diagonal

ASPD, Antisocial personality disorder traits; BPD, Borderline personality disorder traits;

T1, Twin 1; T2, Twin 2; W1, Wave 1; W2, Wave 2

**Table S3. Frequencies of the ordinal levels**

| Ordinal levels | W1 ASPD<br>N (%) | W1 BPD W1<br>N (%) | W2 ASPD W2<br>N (%) | W2 BPD<br>N (%) |
|----------------|------------------|--------------------|---------------------|-----------------|
| 0              | 2060 (74.0)      | 1450 (52.0)        | 1901 (83.4)         | 1473 (64.6)     |
| 1              | 426 (15.3)       | 646 (23.1)         | 255 (11.2)          | 417 (18.3)      |
| 2              | 297 (10.7)       | 695 (24.9)         | 124 (5.4)           | 390 (17.1)      |

ASPD, Antisocial personality disorder traits; BPD, Borderline personality disorder traits;  
W1, Wave 1; W2, Wave 2

**Figure legend**

**Figure S1. Full longitudinal model with parameter estimates and 95%  
confidence intervals**

Abbreviations: ASPD-Antisocial personality disorder, BPD–Borderline personality disorder,  
A–additive genetic effects, E-individual environmental effects, C-shared environmental  
effects, subscript c-common, subscript s-specific, L1-latent factor time 1, L2-latent factor time  
2, W1-wave 1, W2-wave 2, subscript1-time 1, subscript 2-time 2
