# Supplementary material
Source: PubMed Central journal article supplement (PMC4589465)

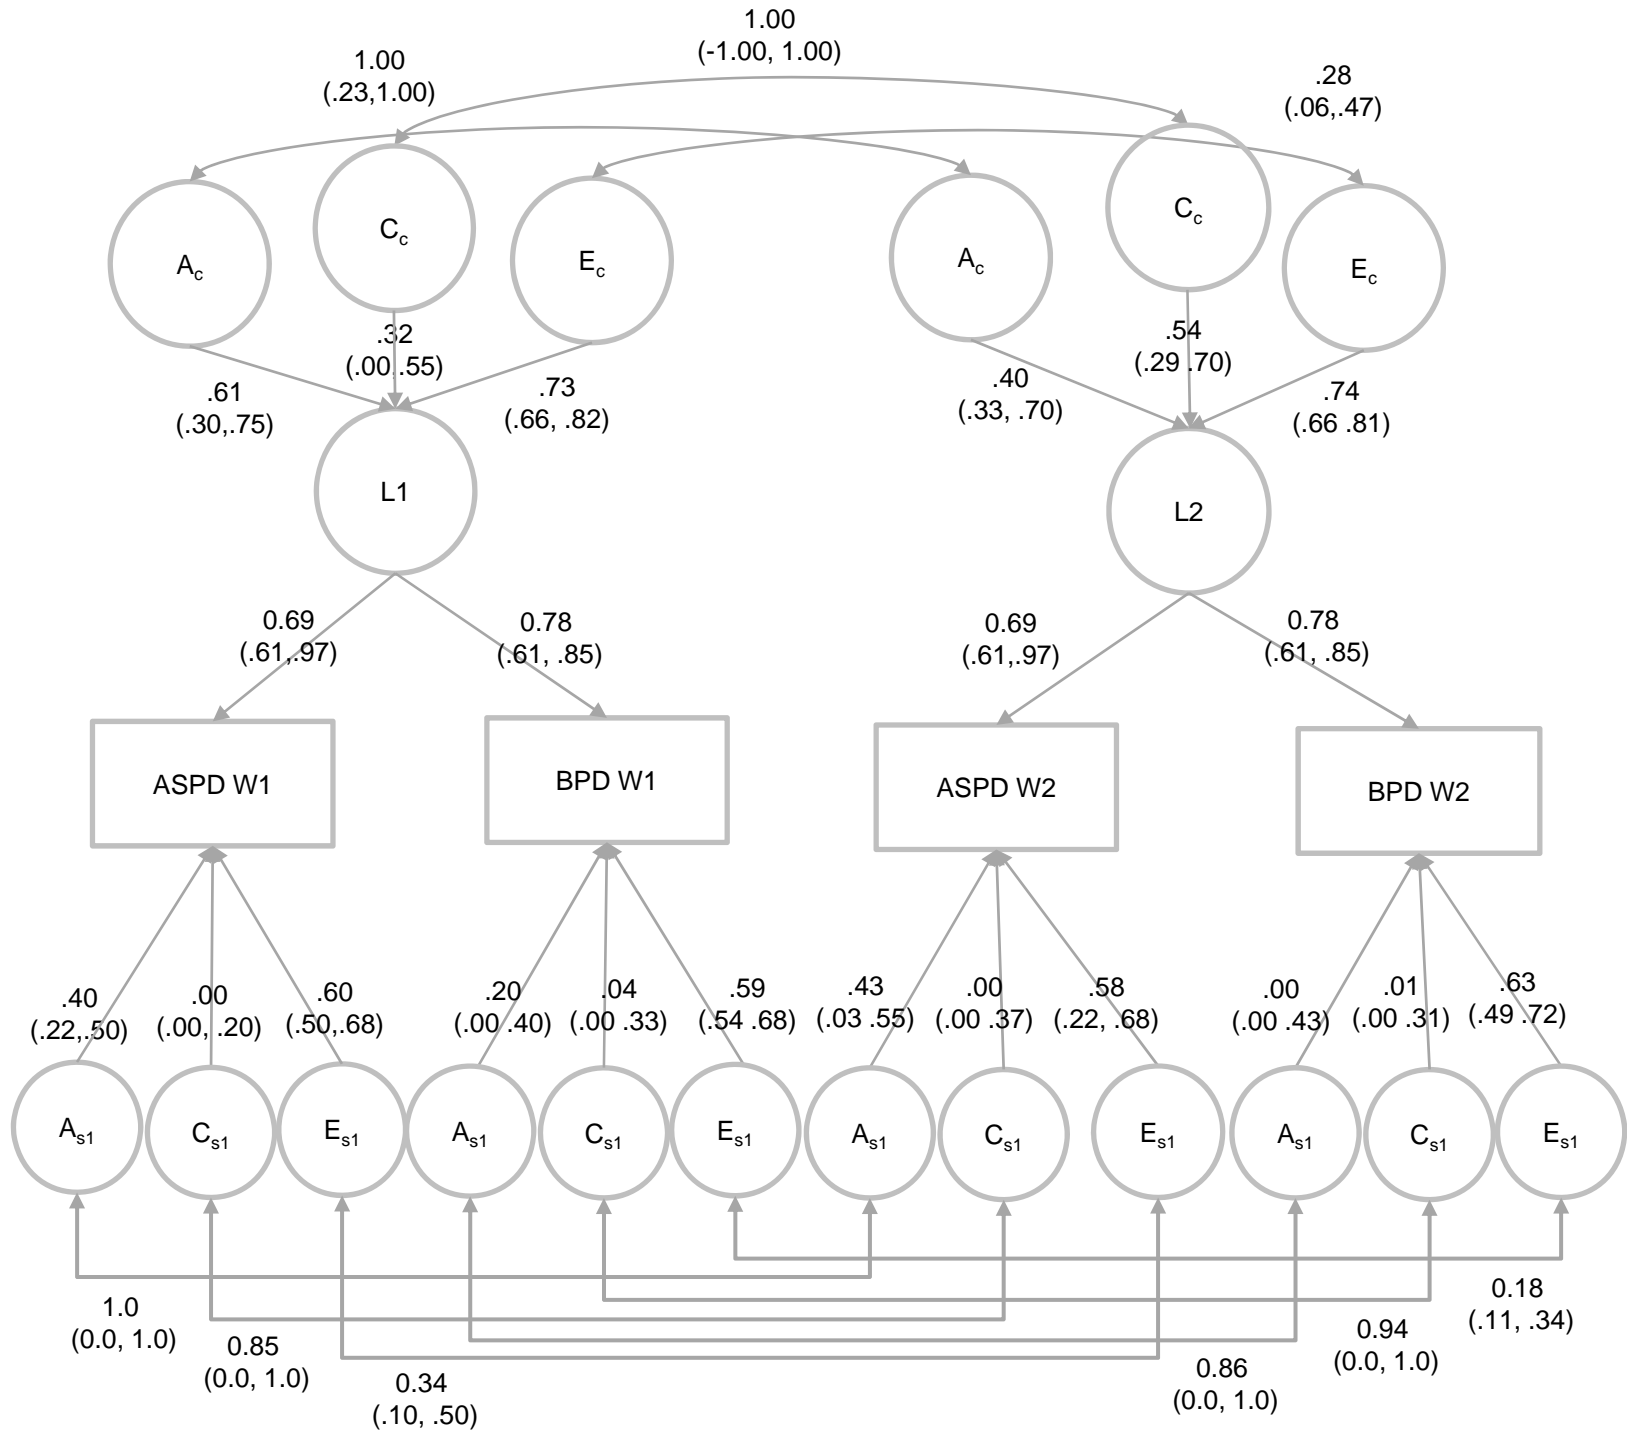

Supplement: NIHMS708555-supplement-Supplementary_Data_1.pdf [file NIHMS708555-supplement-Supplementary_Data_1.pdf]
